# Supplementary material for: Efficient synthesis of new asymmetric tripodal ligands using microwave irradiation, and their crystal structures
Source: Royal Society of Chemistry journal article supplement (doi:10.1039/c4ra07346k), 2014-01-01
Supplement: c4ra07346k1.pdf [file c4ra07346k1.pdf]

Electronic Supplementary Material (ESI) for RSC Advances.  
This journal is © The Royal Society of Chemistry 2014

---

## **Efficient synthesis of new asymmetric tripodal ligands using microwave irradiation, and their crystal structures**

Zeli Yuan,<sup>a,b</sup> Xiaoqing Yang<sup>a</sup>, Lei Wang<sup>a</sup>, Jiandong Huang<sup>\*,a</sup> and Gang Wei<sup>\*,c</sup>,

<sup>a</sup> College of Chemistry, Fuzhou University, Fuzhou 350108, China Tel.: +86 591 22866235; fax: +86 591 22866227; e-mail address: jdhuang@fzu.edu.cn (J.-D. Huang)

<sup>b</sup> School of Pharmacy, Zunyi Medical University, Zunyi, Guizhou, 563003, China. Tel.: +86 852 8608579; fax: +86 8528609343; e-mail address: zlyuan@zmc.edu.cn

<sup>c</sup> CSIRO Materials Science and Engineering, PO Box 218, Lindfield, NSW 2070, Australia. Tel.: +61 2 9413 7704; e-mail address: gang.wei@csiro.au

*This submission was created using the RSC Template (DO NOT DELETE THIS TEXT)*  
*(LINE INCLUDED FOR SPACING ONLY - DO NOT DELETE THIS TEXT)*

---

| <b>Table of Contents</b>                                                     | <b>page</b>    |
|------------------------------------------------------------------------------|----------------|
| <b>General Remarks</b>                                                       | <b>S2</b>      |
| <b>General Procedure</b>                                                     | <b>S3-S7</b>   |
| <b>References</b>                                                            | <b>S7</b>      |
| <br>                                                                         |                |
| <b>X-Ray data for compound 3, 4 and 5 (CCDC : 966462, 966463 and 966464)</b> | <b>S8-S11</b>  |
| <br>                                                                         |                |
| <b>NMR data</b>                                                              | <b>S12-S18</b> |
| <b>H RMS data</b>                                                            | <b>S19-S22</b> |
| <b>FT-IR data</b>                                                            | <b>S23-S26</b> |

---

## General Remarks

### 1. Materials.

All chemical reagents and solvents were purchased from J&K and used without further purification.

### 2. Instrumentation

NMR Spectroscopy: NMR spectra were recorded on Agilent-400MRDD2 spectrometers at 298 K; H RMS: Mass spectra were recorded on a Time-of-Flight Micromass LCT PremierXE Spectrometer; FT-IR : Spectra were recorded on Vary-1000; Melting points were measured on a melting point apparatus and are uncorrected; The apparatus used for the condensation was an XH-100B microwave oven purchased from Beijing Xianggu Science and Technology Development Co., Ltd. (2450 MHz and 100–1000W, Beijing, China).

The crystal data were collected on CCD SMART APEX diffractometer with graphite-mono chromated Mo K $\alpha$  radiation (1/40.71073 Å) at 293 K, 9637 reflections for **3**, 12,490 for **4** and 10,141 reflections for **5**. Cell refinements and the data reductions were obtained from SAINT<sup>1</sup>. Absorption corrections were applied by using multi-scan program SADABS<sup>1</sup>. Structural solutions were performed by direct methods and full-matrix least-square refinement based on  $F^2$  with the SHELXTL program packages.<sup>2</sup> Anisotropic thermal parameters were applied to all non-hydrogen. All atoms and all hydrogen atoms of carbon atoms were placed by geometric calculation. Hydrogen atoms on both nitrogen and oxygen atoms were located in a difference map and were restrained. The SHELXTL<sup>2</sup> and Mercury<sup>3</sup> programs were used to prepare materials for publication and the molecular graphics. CCDC-966462 for **3**, CCDC-966463 for **4** and CCDC-966464 for **5** contain the supplementary crystallographic data for this paper. These data can be obtained free of charge from The Cambridge Crystallographic Data Center via <http://www.ccdc.cam.ac.uk/Community/Requestastructure/Pages/DataRequest.aspx> (or from the Cambridge Crystallographic Data Centre, 12 Union Road, Cambridge CB21EZ, U.K.; fax: t44 1223 336 033 or email [deposit@ccdc.cam.ac.uk](mailto:deposit@ccdc.cam.ac.uk)).

**General Procedure I: Microwave-assisted synthesis of HBPA**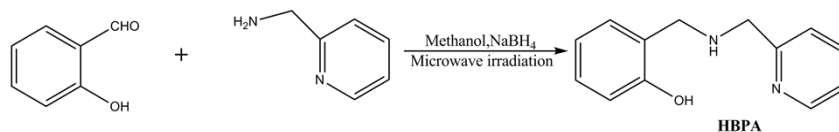

Salicylaldehyde(5 mmol) was placed in a microwave vessel. Methanol(5 mL) and 2-pyridyl - methylamine(5 mmol) were added consecutively. The resultant mixture was heated in a microwave oven(XH-100B microwave oven, which is a monomode instrument) at 60°C with low stirring and 300 W for 10 min. Meanwhile, the system was run at constant temperature operation mode by using the circular water cooling feature of the apparatus. Then, NaBH<sub>4</sub>(5 mmol) was added and the mixture was irradiated at 200 W for another 30 min. After removal of the solvent, the product is redissolved in 15 mL water, and then extracted with CHCl<sub>3</sub>. The chloroform extract was dried over anhydrous sodium sulfate and the solvent was removed under reduced pressure to give an oily mass. The oily mass is allowed to stand for several days, after which the product precipitates was recrystallized from hot ethylacetate to give the colourless crystalline solid. Yield: 96%.M.p.:62-63 °C.

**General Procedure II: Microwave-assisted synthesis of asymmetric tripodal ligands(1-7)**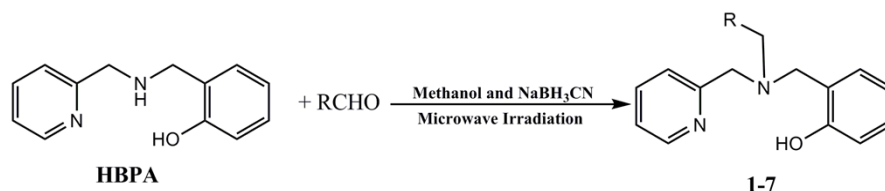

Aromatic aldehyde(5.1 mmol) was placed in a microwave vessel. HBPA (5 mmol) and methanol (5 mL) were added consecutively. The resultant mixture was heated in a microwave oven(XH-100B microwave oven, which is a monomode instrument) at 60°C with low stirring and 300 W for 30 min. Meanwhile, the system was run at constant temperature operation mode by using the circular water cooling feature of the apparatus. Then, NaBH<sub>3</sub>CN (6 mmol) was added and the mixture was irradiated of 300 W at 60 °C(time see Table 2). Basic workup using a saturated aqueous sodium carbonate solution and subsequent extraction using CH<sub>2</sub>Cl<sub>2</sub> was performed. The organic layer was dried over MgSO<sub>4</sub> and evaporated under reduced pressure. The product was purified by recrystallization using proper solvents (yield see Table 2).

**Ligand 1 (Table 2, Entry 1)**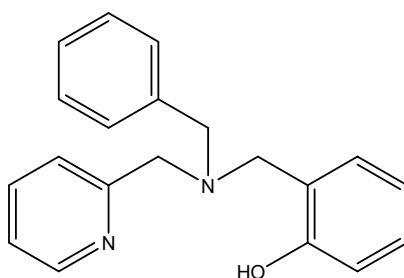

Following Procedure **II**, the product was purified by recrystallization using EtOH and little diethyl ether. m.p. 120-124 °C. <sup>1</sup>H NMR (400MHz, CDCl<sub>3</sub>) δ: 3.71(s, 2H), 3.80(d, *J*= 5.9 Hz, 4H), 6.80-6.84(td, *J*= 7.4, 1.1 Hz, 1H), 6.95-6.97(dd, *J*= 8.1, 0.9 Hz, 1H), 7.06-7.08(dd, *J*= 7.4 Hz, 1H), 7.16-7.28(m, 4H), 7.31-7.39(m, 4H), 7.60-7.65(td, *J*=7.1, 1.3 Hz, 1H), 8.63(dd, *J*=4.9, 0.7 Hz, 1H), 10.88(s, 1H); <sup>13</sup>C NMR (CDCl<sub>3</sub>) δ: 53.1, 54.7, 55.7, 115.5, 116.2, 120.9, 125.5, 128.3, 130.6, 133.6, 136.6, 148.7, 157.7.; HRMS (ESMS) calculated for C<sub>20</sub>H<sub>21</sub>N<sub>2</sub>O(M + H)<sup>+</sup>: 305.1648; found *m/z*: 305.1648.; FT-IR: 3549, 3472, 3414, 3133, 2835, 1583, 1432, 1400, 760.

**Ligand 2 (Table 2, Entry 2)**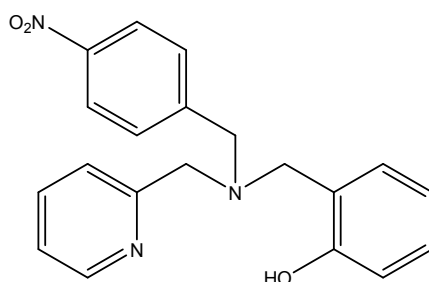

Following Procedure **II**, the product was purified by recrystallization using EtOH and little diethyl ether. m.p. 93-94 °C. <sup>1</sup>H NMR(CDCl<sub>3</sub>) δ: 3.78-3.80(d, *J*= 6.3 Hz, 6H), 6.76-6.79(td, *J*=7.4, 1.1 Hz, 1H), 6.91-6.94(dd, *J*= 8.1, 0.9 Hz, 1H), 7.04-7.06(dd, *J*= 7.4, 1.4 Hz, 1H), 7.16-7.24(m, 3H), 7.51-7.53(d, *J*= 8.7Hz, 2H), 7.64-7.68(td, *J*=7.7, 1.8 Hz, 1H), 8.11-8.13(m, 2H), 8.64-8.66(dd, *J*=4.9, 0.7 Hz, 1H), 10.88(s, 1H); <sup>13</sup>C NMR(CDCl<sub>3</sub>) δ: 56.8, 56.9, 58.1, 116.4, 118.8, 122.1, 123.4, 129.1, 136.8, 145.8, 156.9; HRMS (ESMS) calculated for C<sub>20</sub>H<sub>20</sub>N<sub>3</sub>O<sub>3</sub>(M + H)<sup>+</sup>: 350.1499, found: 350.1499; FT-IR: 3548, 3471, 3415, 3134, 2817, 1598, 1515, 1400, 1344, 893, 757.

**Ligand 3 (Table 2, Entry 3)**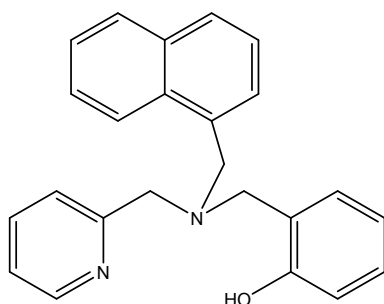

Following Procedure II, the product was purified by recrystallization using EtOH and little diethyl ether. m.p. 155-156 °C.  $^1\text{H NMR}(\text{CDCl}_3)$   $\delta$ : 3.68-3.71(d,  $J=13.5$  Hz, 1H), 3.83-3.89(dd,  $J=15.6$ , 9.8 Hz, 2H), 4.05-4.14(dd,  $J=34.5$ , 14.4 Hz, 2H), 4.40-4.44(d,  $J=13.4$  Hz, 6H), 6.89-6.94(m, 1H), 7.02-7.04(d,  $J=7.8$  Hz, 1H), 7.08-7.24(m, 3H), 7.34-7.47(m, 4H), 7.54-7.56(td,  $J=7.7$ , 1.8 Hz, 1H), 7.55-7.65(m, 1H), 7.72-7.81(m, 2H), 7.81-7.92(m, 1H), 8.49-8.50(d,  $J=4.4$  Hz, 1H), 11.24(s, 1H);  $^{13}\text{C NMR}(\text{CDCl}_3)$   $\delta$ : 53.10, 54.7, 55.7, 115.5, 116.9, 118.8, 119.0, 122.1, 123.5, 124.2, 125.5, 126.4, 127.2, 128.2, 129.7, 130.1, 131.1, 133.6, 136.9, 148.7, 157.7; HRMS (ESMS) calculated for  $\text{C}_{24}\text{H}_{22}\text{N}_2\text{O}(\text{M} + \text{H})^+$ : 355.1805, found: 355.1804; FT-IR: 3467, 3415, 3127, 2832, 1602, 1582, 1489, 1399, 1249, 780.

**Ligand 4 (Table 2, Entry 4)**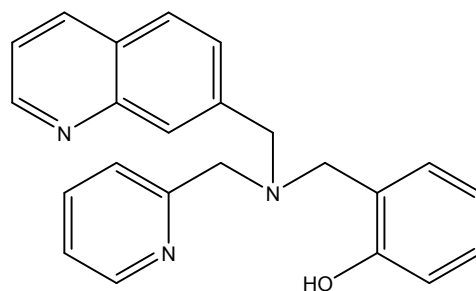

Following Procedure II, the product was purified by recrystallization using EtOH and little diethyl ether. m.p. 147-148 °C.  $^1\text{H NMR}(\text{CDCl}_3)$   $\delta$ : 3.87-3.91(d,  $J=19.1$  Hz, 4H), 4.06(s, 2H), 6.77-6.81(m, 1H), 6.99-7.01(d,  $J=8.0$  Hz, 1H), 7.10-7.13(dd,  $J=9.8$ , 5.9 Hz, 2H), 7.19-7.23(m, 2H), 7.36-7.42(m, 1H), 7.48-7.59(m, 2H), 7.69-7.76(m, 2H), 8.05-8.07(d,  $J=8.5$  Hz, 2H), 8.23-8.25(d,  $J=8.5$  Hz, 1H), 8.55-8.56(d,  $J=4.3$  Hz, 1H), 11.24(s, 1H);  $^{13}\text{C NMR}(\text{CDCl}_3)$   $\delta$ : 56.9, 58.6, 59.5, 116.4, 118.5, 120.5, 122.7, 126.1, 127.0, 128.5, 129.4, 130.2, 147.1, 148.5, 157.4, 158.3; HRMS (ESMS) calculated for  $\text{C}_{23}\text{H}_{22}\text{N}_3\text{O}(\text{M} + \text{H})^+$ : 356.1763, found: 356.1760. FT-IR: 3467, 3415, 3134, 2813, 1596, 1488, 1234, 759.

**Ligand 5 (Table 2 ,Entry 5)**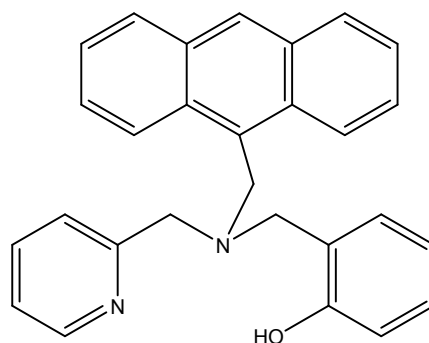

Following Procedure II, the product was purified by recrystallization using EtOH. m.p. 204-205 °C.  $^1\text{H NMR}(\text{CDCl}_3)$   $\delta$ : 3.84-3.94 (m, 4H), 4.68(s, 2H), 6.74-6.77(t,  $J=7.1\text{Hz}$ , 1H), 6.84-6.86(d,  $J=8.0\text{Hz}$ , 1H), 7.05-7.06(d,  $J=6.5\text{Hz}$ , 1H), 7.14-7.15(dd,  $J=11.1, 1.9\text{Hz}$ , 1H), 7.20-7.24(m, 1H), 7.42-7.49(m, 5H), 7.64-7.68(t,  $J=7.7\text{Hz}$ , 1H), 7.96-7.97(d,  $J=8.2\text{Hz}$ , 2H), 8.18-8.20(d,  $J=8.8\text{Hz}$ , 2H), 8.389(s, 1H), 8.62-8.63(d,  $J=4.5\text{Hz}$ , 1H), 10.78(s, 1H);  $^{13}\text{C NMR}(\text{CDCl}_3)$   $\delta$ : 50.1, 57.3, 59.5, 116.3, 119.1, 122.4, 124.2, 126.1, 129.8, 131.3, 136.7, 148.8, 157.6; HRMS (ESMS) calculated for

$\text{C}_{28}\text{H}_{25}\text{N}_2\text{O}$  (M +H) $^+$ : 405.1967, found:405.1965; FT-IR: 3471, 3414, 3135, 2805, 1617, 1583, 1400, 1241, 780.

**Ligand 6 (Table 2 ,Entry 6)**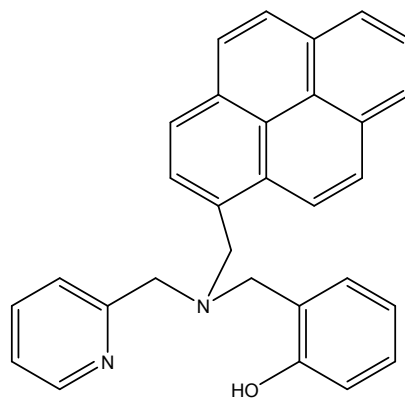

Following Procedure II, the product was purified by recrystallization using EtOH. m.p.181-182 °C.  $^1\text{H NMR}(\text{CDCl}_3)$   $\delta$ : 3.86-3.87(d,  $J=2.6\text{Hz}$ , 4H), 4.35(s, 2H), 6.84-6.88(m, 1H), 6.99-7.01 (d,  $J=7.9\text{Hz}$ , 1H), 7.13-7.16(m, 3H), 7.24-7.28(m, 1H), 7.55-7.59(td,  $J=7.7, 1.6\text{Hz}$ , 1H), 7.95 -7.99(m, 4H), 8.00-8.08(dd,  $J=8.5, 2.5\text{Hz}$ , 2H), 8.12-8.16(m, 3H), 8.64-8.65(d,  $J=4.3\text{Hz}$ , 1H), 10.82(s, 1H);  $^{13}\text{C NMR}(\text{CDCl}_3)$   $\delta$ : 56.1, 57.2, 58.7, 116.3, 125.7, 130.8, 148.6, 157.4; HRMS (ESMS) calculated for  $\text{C}_{30}\text{H}_{25}\text{N}_2\text{O}$ (M +H) $^+$ : 429.1967, found:429.1961; FT-IR: 3464, 3416, 3143, 2816, 1581, 1488, 1400, 841, 707.

**Ligand 7 (Table 2 ,Entry 7)**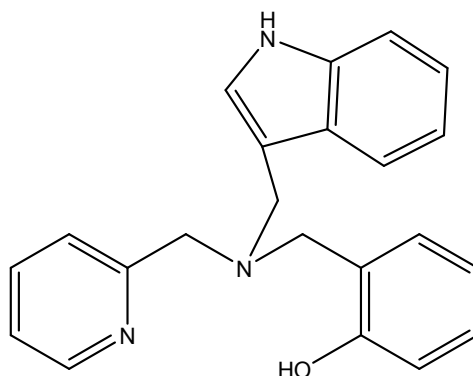

Following Procedure **II**, the product was purified by recrystallization using EtOH. m.p. 178-179 °C.  $^1\text{H}$  NMR( $\text{CDCl}_3$ )  $\delta$ : 3.86-3.89(d,  $J=9.6$  Hz, 4H), 3.94(s, 2H), 4.02-4.09(m, 1H), 6.77-6.79(m, 1H), 6.80-6.90(m, 1H), 7.03-7.04(m, 1H), 7.11-7.21(m, 2H), 7.32-7.36(m, 2H), 7.57-7.59(m, 2H), 7.64-7.68(m, 1H), 8.34(s, 1H), 8.53-8.61(d,  $J=4.2$ Hz, 1H), 10.81(s, 1H);  $^{13}\text{C}$  NMR( $\text{CDCl}_3$ )  $\delta$ : 48.2, 56.7, 58.7, 111.0, 116.8, 118.7, 122.2, 127.4, 128.6, 129.2, 136.0, 136.6, 148.8, 157.3; HRMS (ESMS) calculated for  $\text{C}_{22}\text{H}_{22}\text{N}_3\text{O}$  ( $\text{M}+\text{H}$ ) $^+$ : 344.1763, found: 344.1760.; FT-IR: 3545, 3468, 3415, 3140, 2891, 1617, 1597, 1401, 1254, 876, 748.

**References and notes**

1. Bruker. SMART, SAINT and SADABS; Bruker AXS: Madison, WI, USA, 2003.
2. G. M. Sheldrick, *Acta. Crystallogr.*, 2008, **A64**, 112.
3. C. F. Macrae, I. J. Bruno, J. A. Chisholm, P. R. Edgington, P. McCabe, E. Pidcock, L. Rodriguez-Monge, R. Taylor, J. Vande-Streek and P. A. Wood, *J. Appl. Crystallogr.*, 2008, **41**, 466.



## X-Ray data for ligands 3, 4 and 5

Table S1 Crystal data and structure refinement for 3, 4 and 5

| Formula                                            | C <sub>24</sub> H <sub>22</sub> N <sub>2</sub> O(3) | C <sub>23</sub> H <sub>21</sub> N <sub>3</sub> O(4) | C <sub>28</sub> H <sub>24</sub> N <sub>2</sub> O(5) |
|----------------------------------------------------|-----------------------------------------------------|-----------------------------------------------------|-----------------------------------------------------|
| <b>Molecular weight</b>                            | 354.44                                              | 355.43                                              | 404.49                                              |
| <b>space group</b>                                 | P 21/n                                              | P2(1)/c                                             | P 21/n                                              |
| <b><i>a</i> (Å, )</b>                              | 13.197(11)                                          | 9.929(10)                                           | 13.918(18)                                          |
| <b><i>b</i> (Å, )</b>                              | 11.102(9)                                           | 12.099(12)                                          | 11.138(14)                                          |
| <b><i>c</i> (Å, )</b>                              | 14.265(12)                                          | 16.261(16)                                          | 14.314(17)                                          |
| <b><i>β</i> (°)</b>                                | 111.786(14)                                         | 96.512(11)                                          | 110.04(2)                                           |
| <b><i>V</i> (Å<sup>3</sup>)</b>                    | 1941(3)                                             | 1941(3)                                             | 2085(4)                                             |
| <b><i>Z</i></b>                                    | 4                                                   | 4                                                   | 4                                                   |
| <b><i>D</i><sub>calc</sub> (g cm<sup>-3</sup>)</b> | 1.213                                               | 1.216                                               | 1.289                                               |
| <b>Absorption corr Ψ-scan max., min</b>            | 0.9845,0.9809                                       | 0.9857,0.9827                                       | 0.9784,0.9853                                       |
| <b><i>F</i>(000)</b>                               | 752.0                                               | 752.0                                               | 856.0                                               |
| <b>Crystal size (mm)</b>                           | 0.26×0.21×0.21                                      | 0.23×0.21×0.19                                      | 0.28×0.21×0.19                                      |
| <b><i>θ</i> range data collection</b>              | 1.00-24.99                                          | 2.06-25.00                                          | 1.76-24.99                                          |
|                                                    | -15 ≤ <i>h</i> ≤ 15                                 | -10 ≤ <i>h</i> ≤ 11                                 | -13 ≤ <i>h</i> ≤ 16                                 |
| <b>Index ranges</b>                                | -10 ≤ <i>k</i> ≤ 13                                 | -14 ≤ <i>k</i> ≤ 14                                 | -13 ≤ <i>k</i> ≤ 12                                 |
|                                                    | -16 ≤ <i>l</i> ≤ 16                                 | -17 ≤ <i>l</i> ≤ 19                                 | -16 ≤ <i>l</i> ≤ 11                                 |
| <b>Reflections measured</b>                        | 3421                                                | 3386                                                | 3674                                                |
| <b>Reflections [<i>I</i>&gt;2δ(<i>I</i>)]</b>      | 2061                                                | 2267                                                | 1901                                                |
| <b>Data/parameters</b>                             | 3421/245                                            | 3386/245                                            | 3674/281                                            |
| <b>Goodness-of-fit on <i>F</i><sup>2</sup></b>     | 0.999                                               | 0.972                                               | 0.966                                               |
| <b><i>R</i> [<i>I</i>&gt;2δ(<i>I</i>)]</b>         | 0.044                                               | 0.0801                                              | 0.0819                                              |
| <b><i>wR</i><sup>2</sup> (all data)</b>            | 0.1374                                              | 0.1533                                              | 0.2617                                              |

**Table S2** Selected bonds lengths(Å) and angles (°) of **3**, **4** and **5**

|                     | <b>3</b>           |                  | <b>4</b>           |                  | <b>5</b>           |
|---------------------|--------------------|------------------|--------------------|------------------|--------------------|
| <i>Bond lengths</i> |                    |                  |                    |                  |                    |
| N1-C5               | 1.4459<br>(0.0024) | N1-C5            | 1.4682<br>(0.0024) | N1-C5            | 1.4431<br>(0.0046) |
| N1-C1               | 1.4679<br>(0.0021) | N1-C1            | 1.4730<br>(0.0023) | N1-C1            | 1.4496<br>(0.0043) |
| N2-C14              | 1.4718<br>(0.0021) | N2-C14           | 1.4894<br>(0.0024) | N2-C14           | 1.4468<br>(0.0042) |
| N2-C6               | 1.3266<br>(0.0023) | N2-C6            | 1.3506<br>(0.0025) | N2-C6            | 1.3228<br>(0.0047) |
| N2-C7               | 1.3376<br>(0.0022) | N2-C7            | 1.3537<br>(0.0027) | N2-C7            | 1.3494<br>(0.0053) |
| O1-C13              | 1.371(2)           | O1-C13           | 1.3825<br>(0.0028) | O1-C13           | 1.3922<br>(0.0049) |
| O1-H1               | 0.8200             | N3- C15          | 1.3950<br>(0.0024) | O1-H1            | 0.8200             |
|                     |                    | O1-H1            | 0.8200             |                  |                    |
| <i>Bond angles</i>  |                    |                  |                    |                  |                    |
| C(13)-O(1)-H(1)     | 109.5              | C(13)-O(1)-H(1)  | 109.5              | C(13)-O(1)-H(1)  | 109.5              |
| C(1)-N(1)-C(5)      | 111.97(15)         | C(1)-N(1)-C(5)   | 118.3 (5)          | C(1)-N(1)-C(5)   | 112.3(3)           |
| C(8)-N(1)-C(14)     | 110.93(14)         | C(6)-N(1)-C(5)   | 121.09(3)          | C(16)-N(1)-C(22) | 111.7(3)           |
| C(6)-N(2)-C(7)      | 117.39(17)         | N(1)-C(2)-C(3)   | 110.71(4)          | C(6)-N(2)-C(7)   | 118.1(4)           |
| N(2)-C(7)-C(8)      | 121.41(16)         | C(5)-N(2)-C(6)   | 110.71(9)          | N(2)-C(7)-C(8)   | 121.1(3)           |
| N(2)-C(6)-C(7)      | 118.74(16)         | C(7)-N(2)-C(8)   | 118.00(9)          | N(2)-C(5)-C(6)   | 118.7(3)           |
| N(2)-C(14)-C(15)    | 123.96(19)         | N(2)-C(14)-C(15) | 111.68(8)          | N(2)-C(14)-C(15) | 123.8(4)           |

**Table S3** Hydrogen-bond geometry(Å) parameters for **3**, **4** and **5**

| Ligand   | D-H...A    | d(D-H) | d(H..A) | <DHA   | d(D..A) |
|----------|------------|--------|---------|--------|---------|
| <b>3</b> | O1-H1...N1 | 0.820  | 2.498   | 133.64 | 3.121   |
|          | O1-H1...N2 | 0.820  | 2.061   | 152.04 | 2.811   |
| <b>4</b> | O1-H1...N1 | 0.820  | 2.108   | 154.56 | 2.870   |
|          | O1-H1...N2 | 0.820  | 2.478   | 126.85 | 3.042   |
| <b>5</b> | O1-H1...N1 | 0.820  | 2.360   | 135.36 | 2.999   |
|          | O1-H1...N2 | 0.820  | 2.030   | 145.78 | 2.747   |

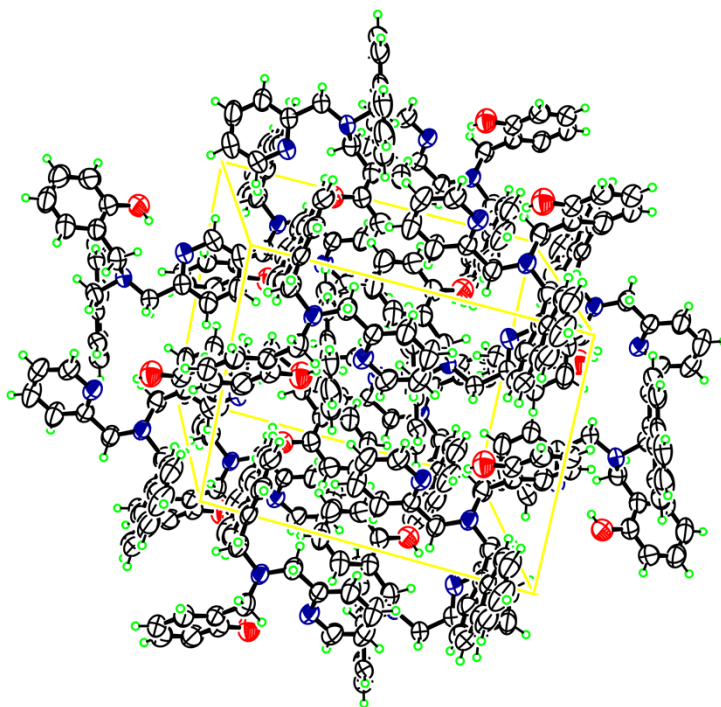

**Fig. S1** The hydrogen bond interaction in ligand **3** (c-axis projection)

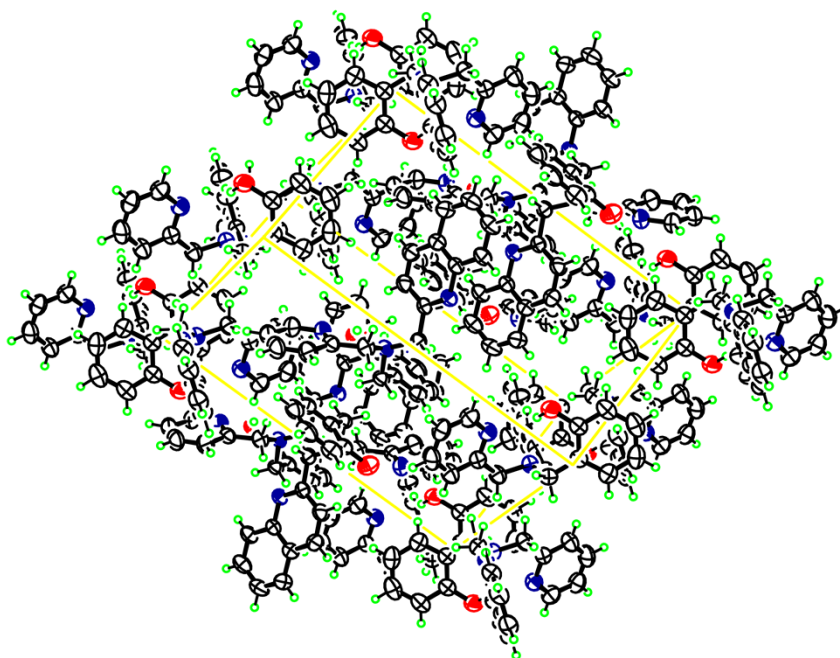

**Fig. S2** The hydrogen bond interaction in ligand **4** (c-axis projection)

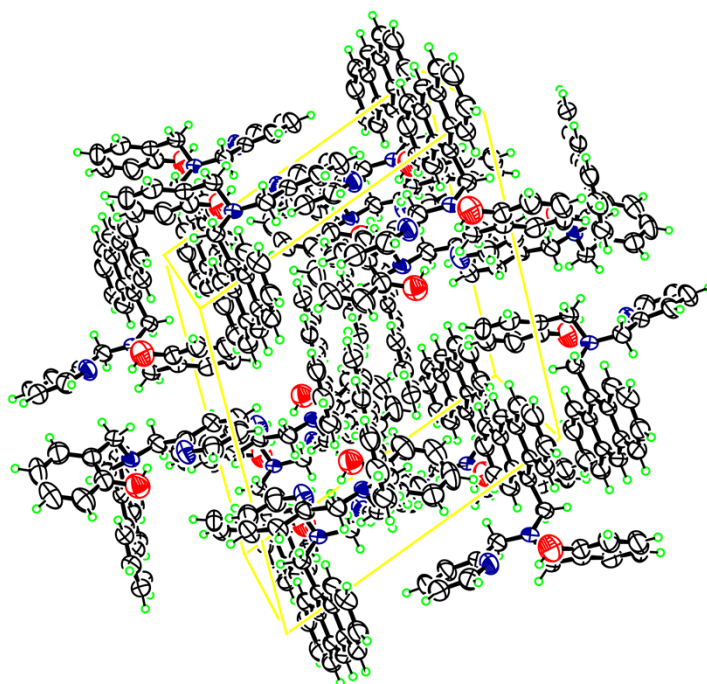

**Fig. S3** The hydrogen bond interaction in ligand 5 (c-axis projection)

## NMR data

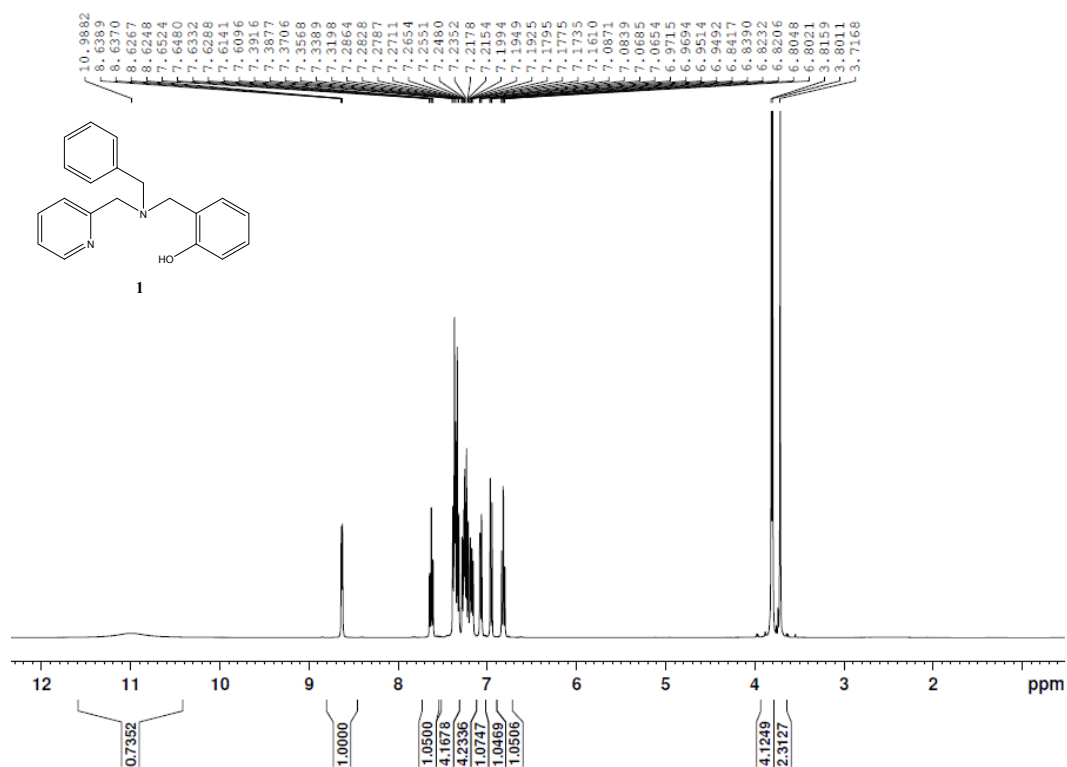Fig. S4 The <sup>1</sup>H NMR spectroscopy of **1**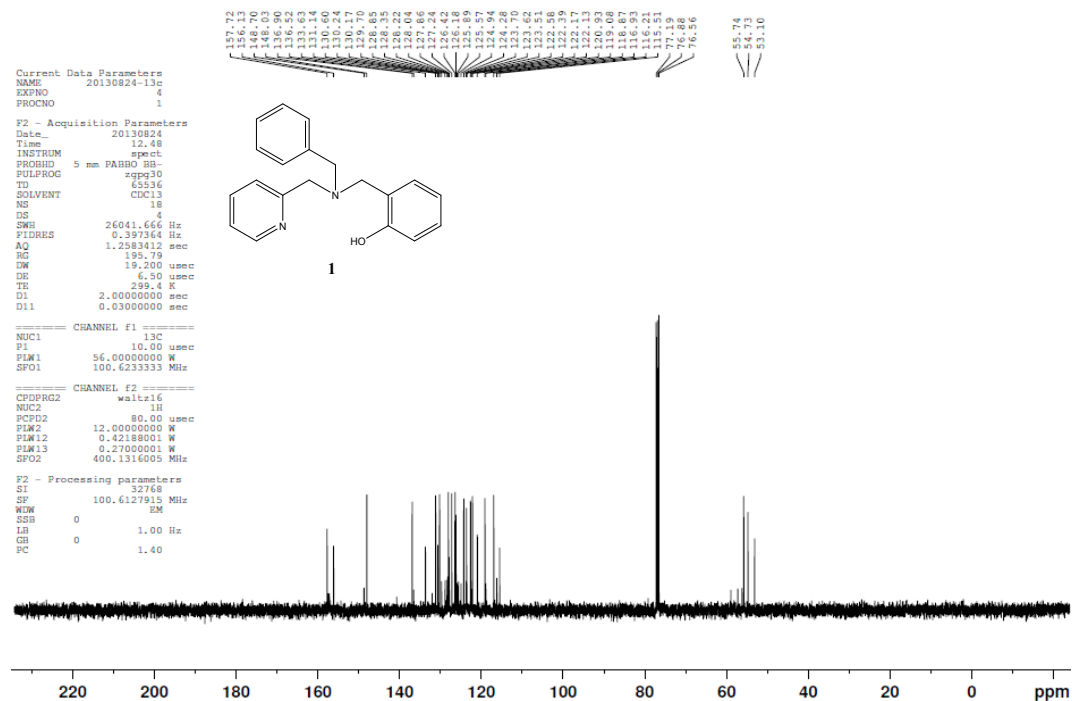Fig. S5 The <sup>13</sup>C NMR spectroscopy of **1**

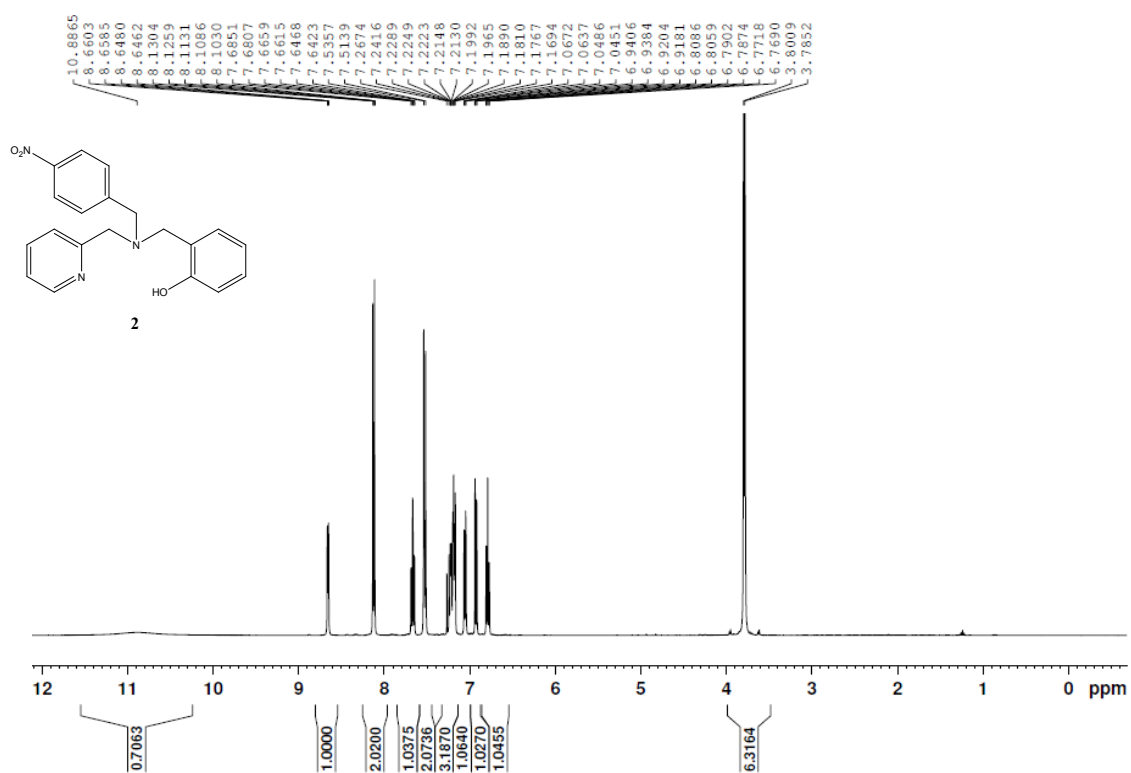Fig. S6 The <sup>1</sup>H NMR spectroscopy of 2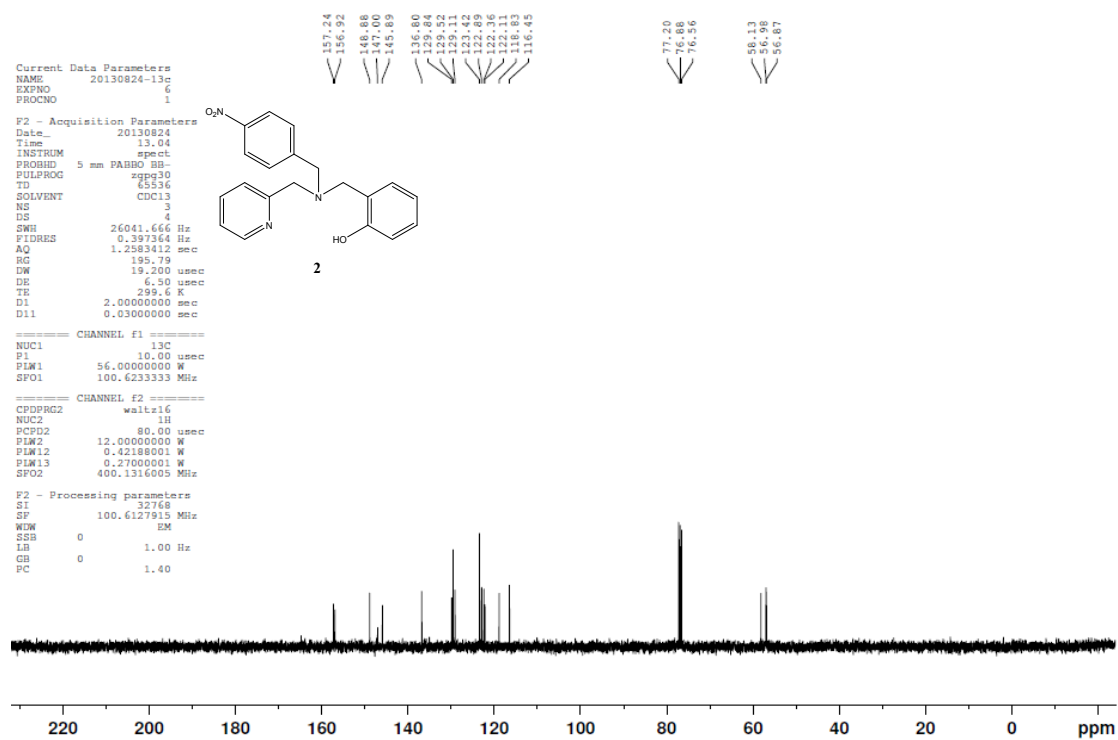Fig. S7 The <sup>13</sup>C NMR spectroscopy of 2

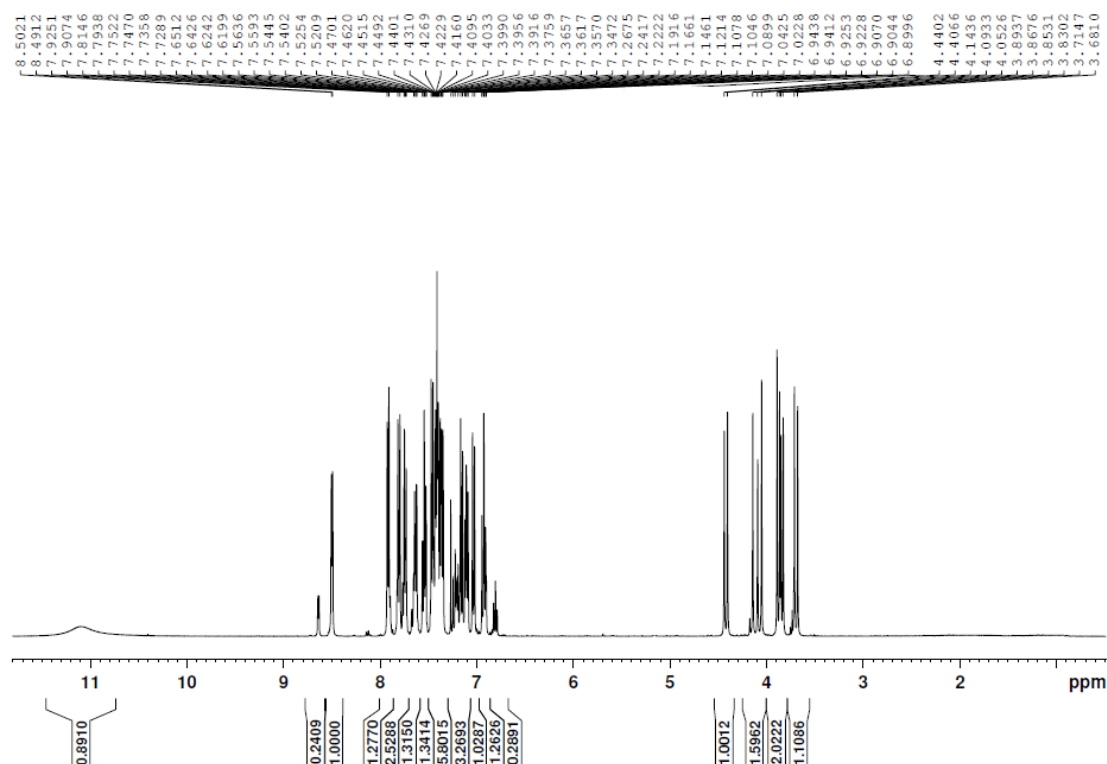Fig. S8 The  $^1\text{H}$  NMR spectroscopy of **3**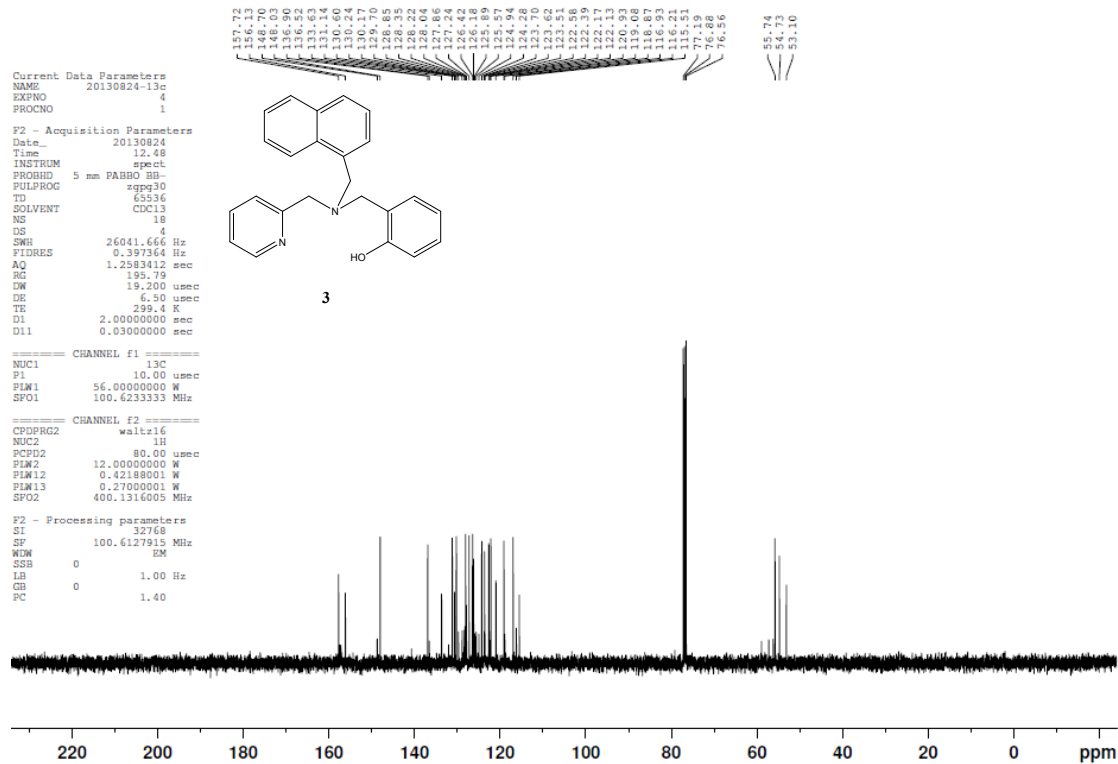Fig. S9 The  $^{13}\text{C}$  NMR spectroscopy of **3**

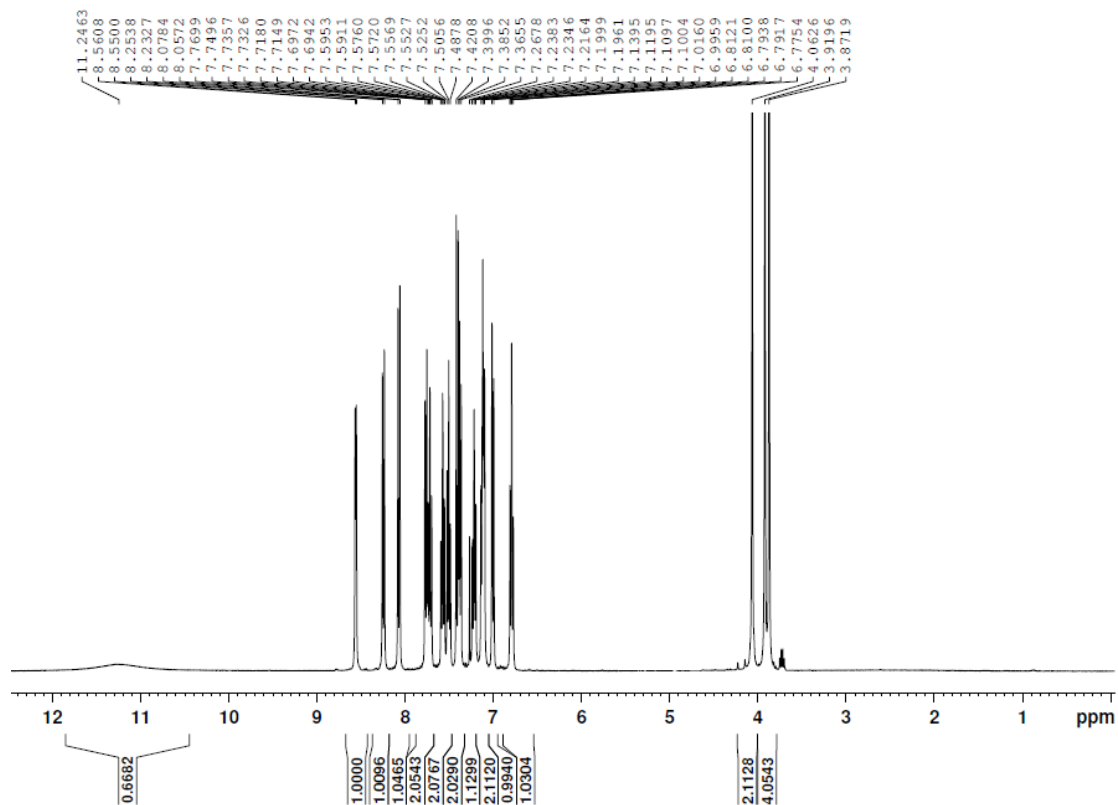Fig. S10 The  $^1\text{H}$  NMR spectroscopy of 4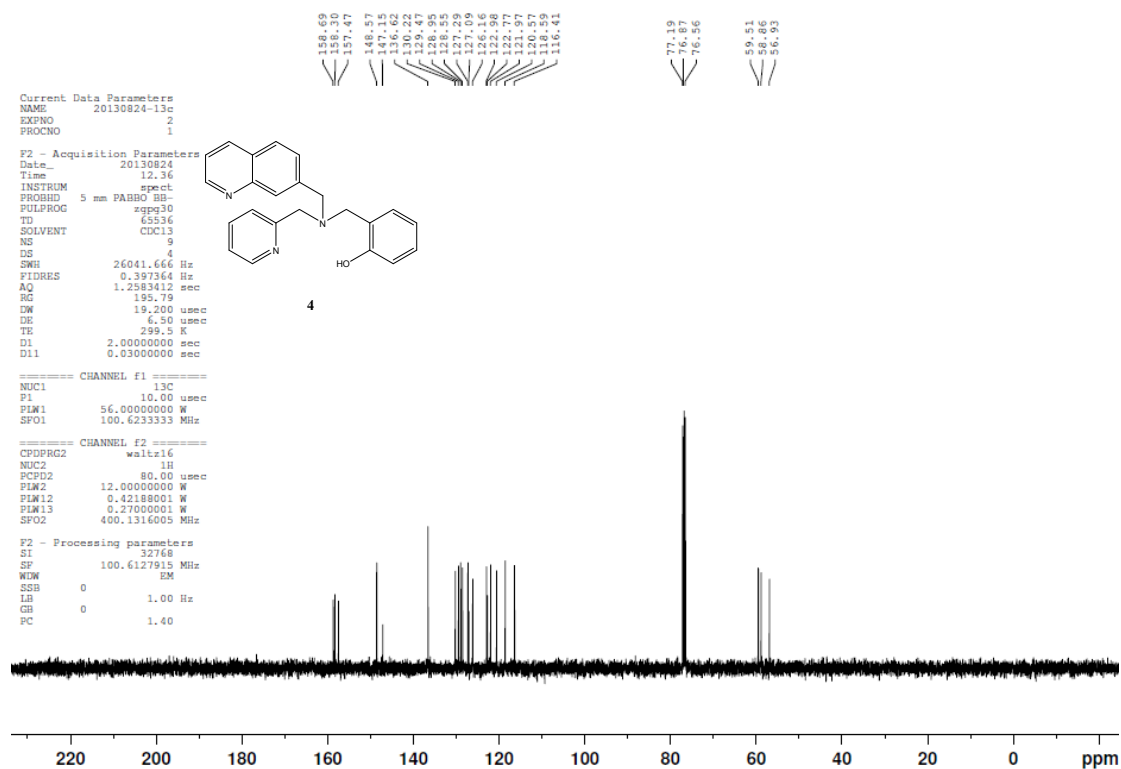Fig. S11 The  $^{13}\text{C}$  NMR spectroscopy of 4



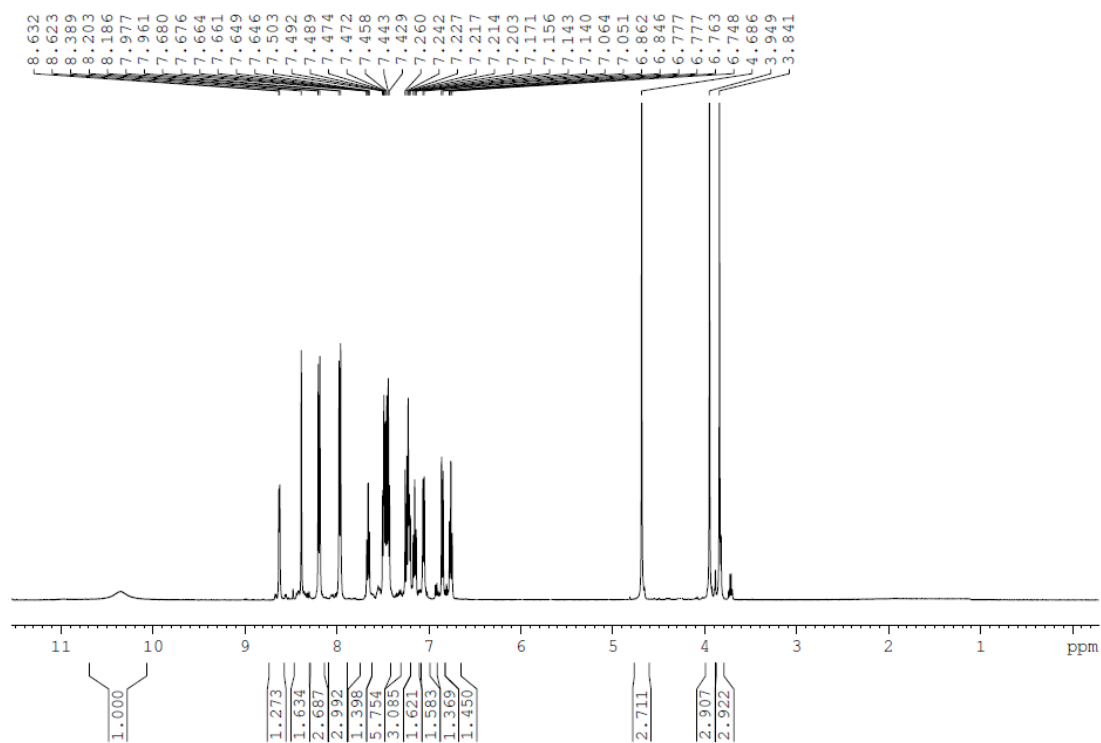Fig. S12 The <sup>1</sup>H NMR spectroscopy of 5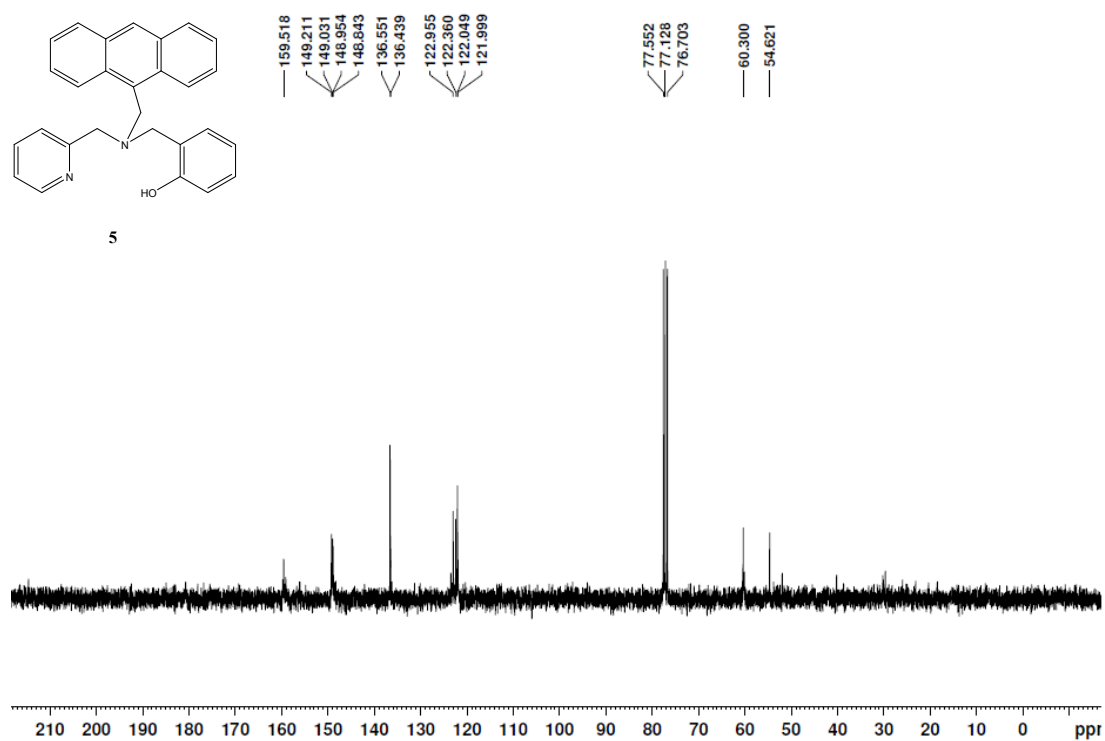Fig. S13 The <sup>13</sup>C NMR spectroscopy of 5

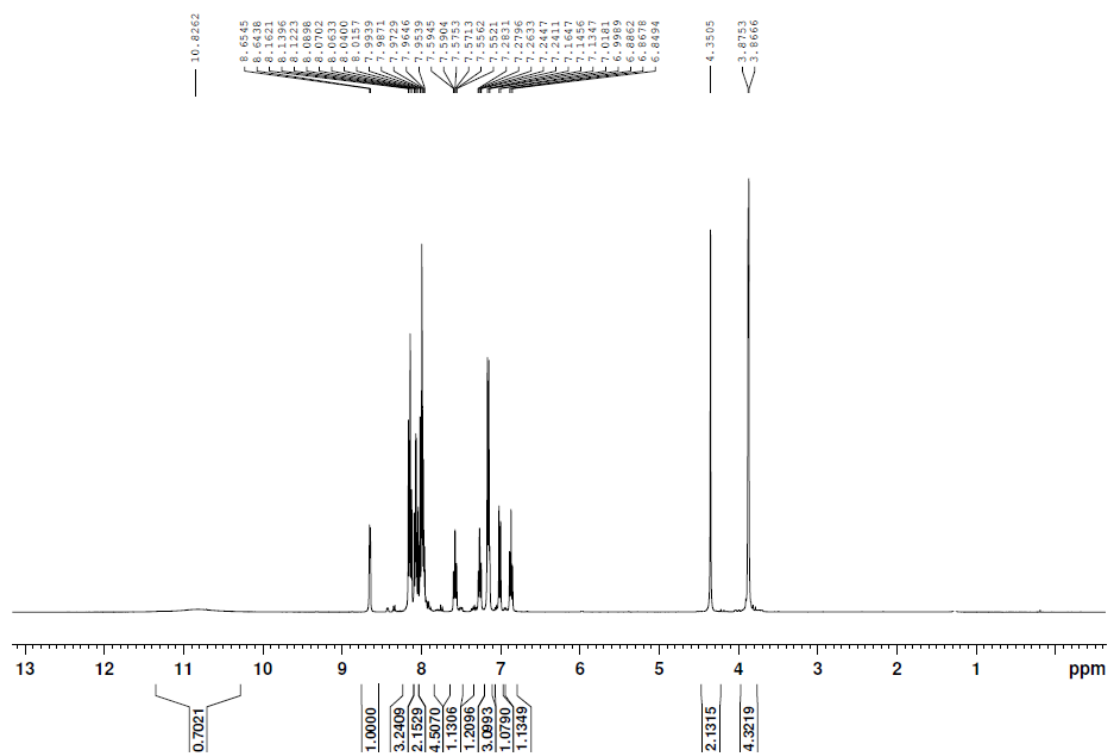Fig. S14 The  $^1\text{H}$  NMR spectroscopy of **6**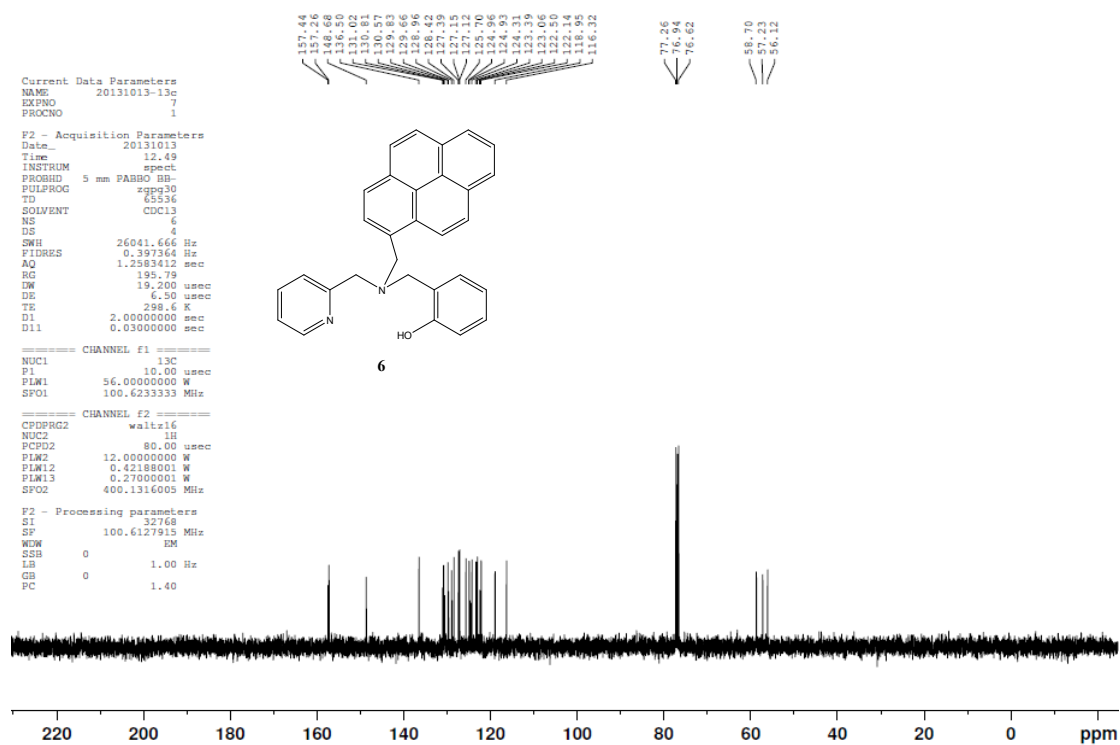Fig. S15 The  $^{13}\text{C}$  NMR spectroscopy of **6**

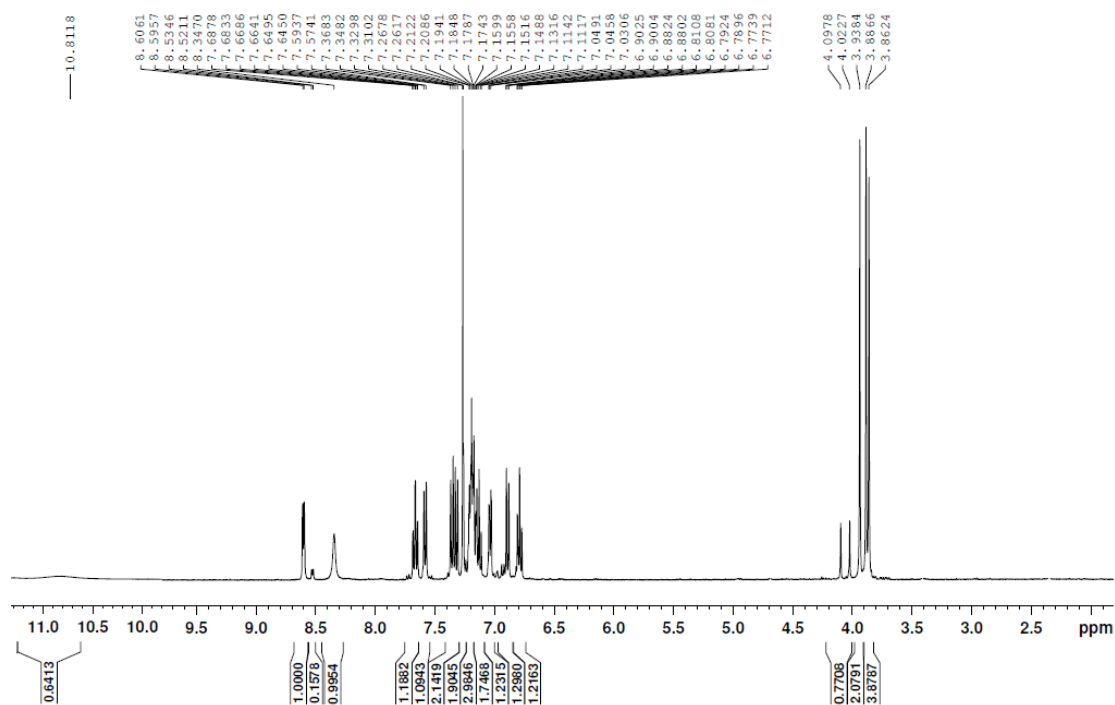Fig. S16 The  $^1\text{H}$  NMR spectroscopy of 7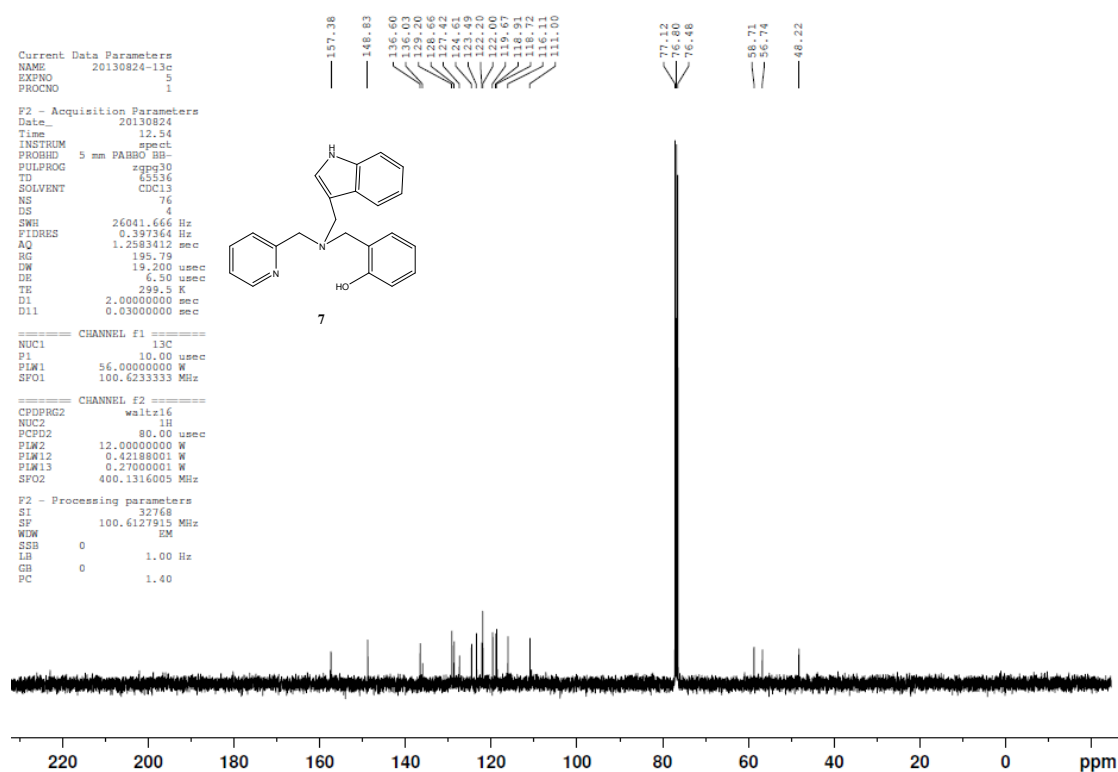Fig. S17 The  $^{13}\text{C}$  NMR spectroscopy of 7

## H RMS data

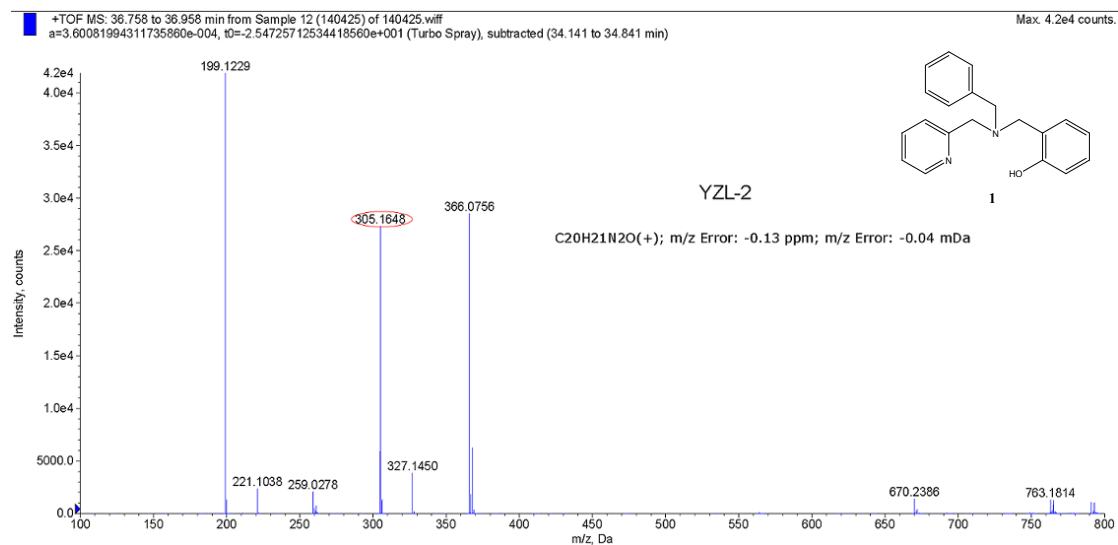

Fig. S18 The HR-MS spectroscopy of 1

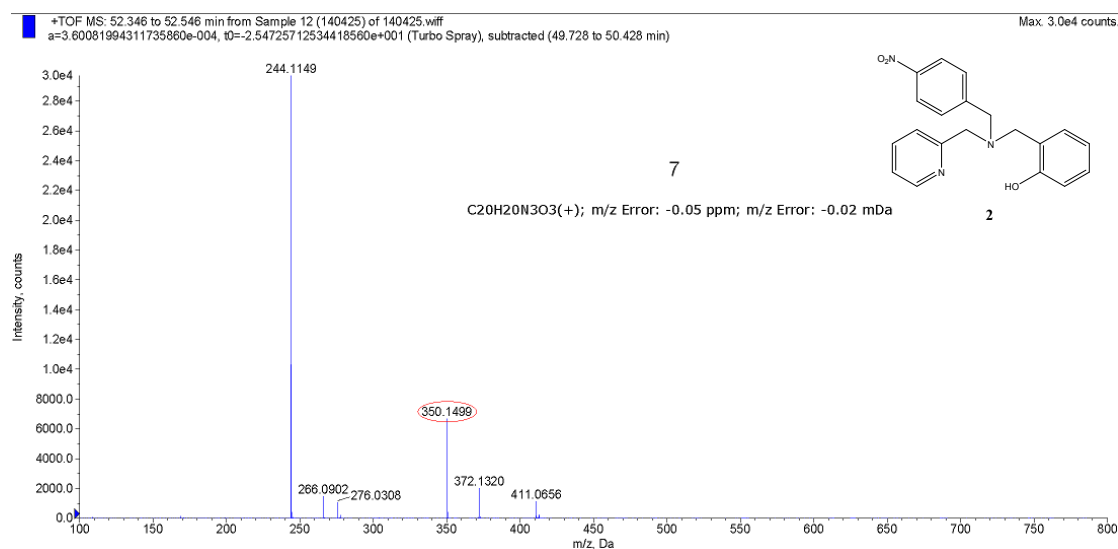

Fig. S19 The HR-MS spectroscopy of 2

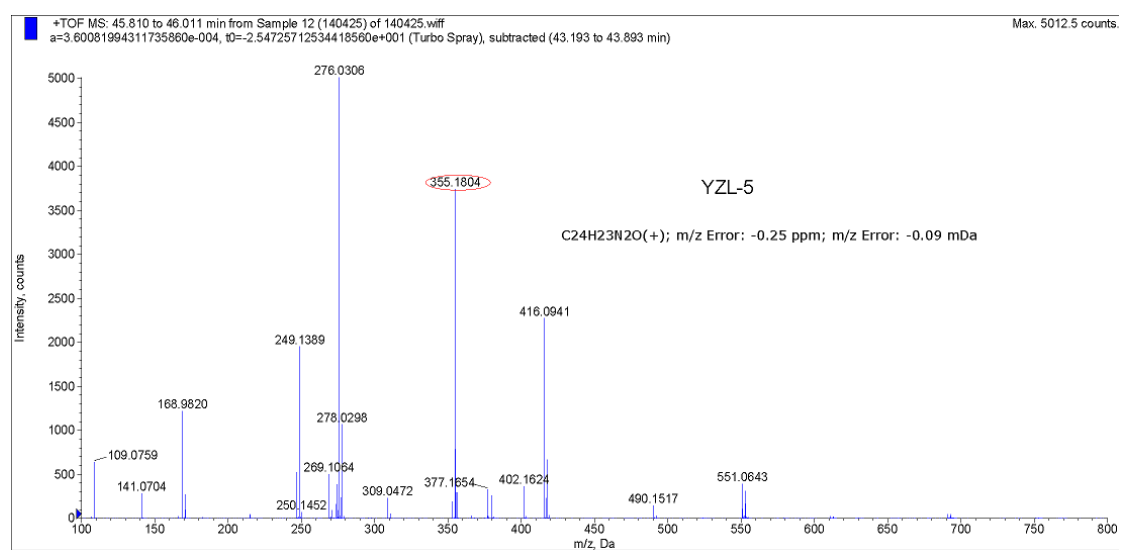

Fig. S20 The HR-MS spectroscopy of 3

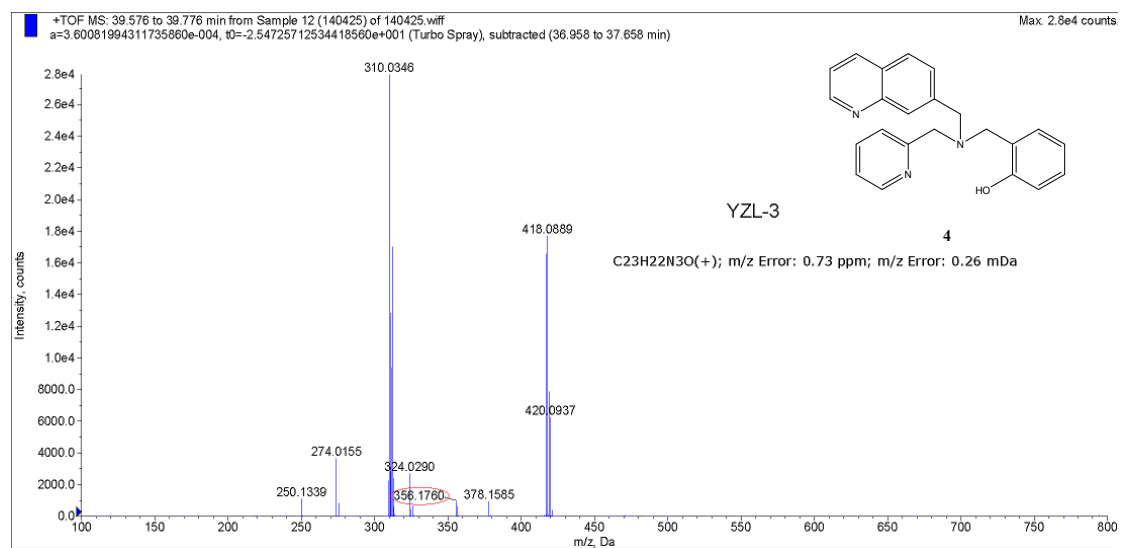

Fig. S21 The HR-MS spectroscopy of 4

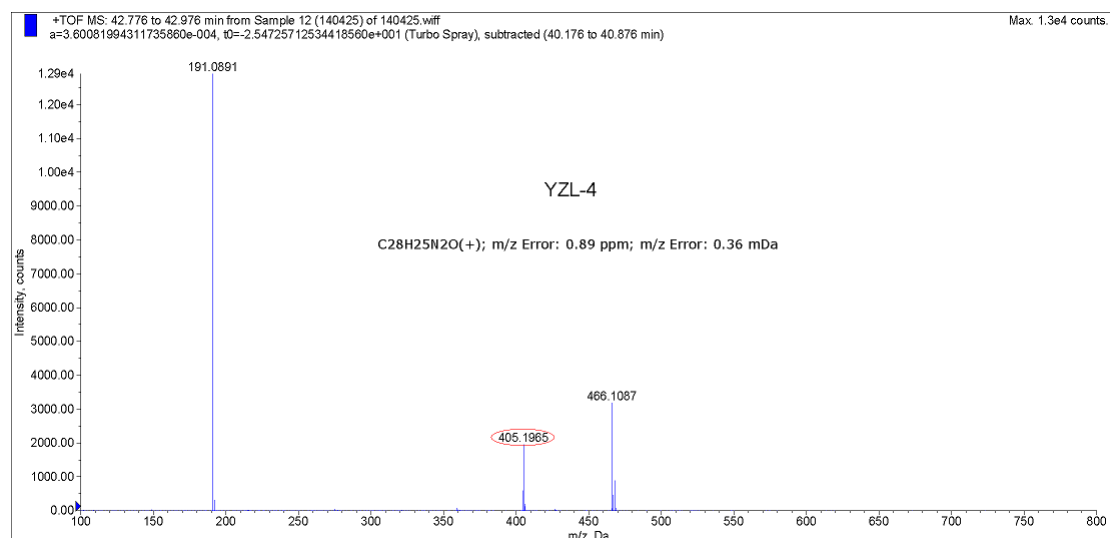

Fig. S22 The HR-MS spectroscopy of 5

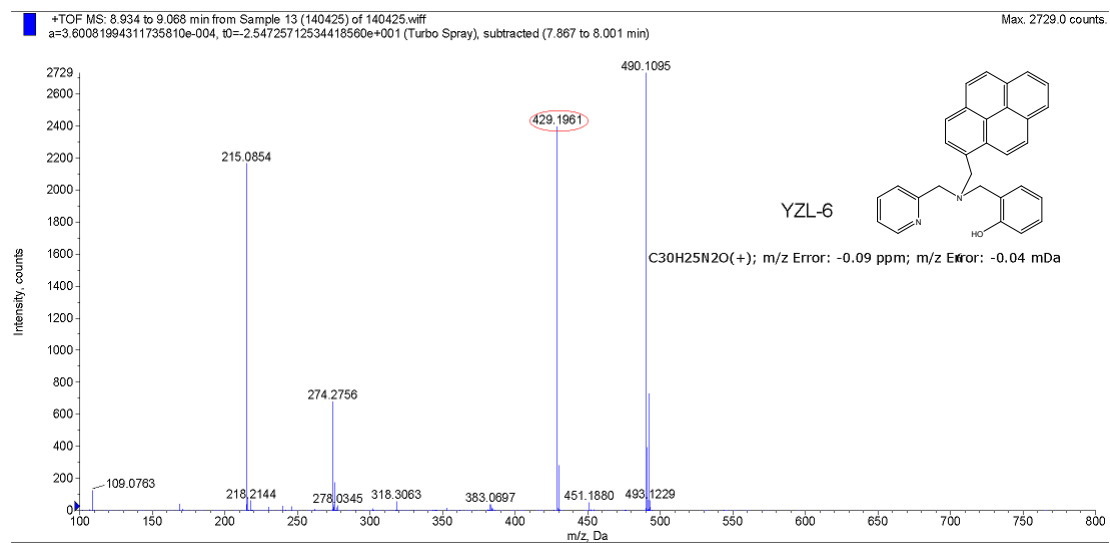

Fig. S23 The HR-MS spectroscopy of 6

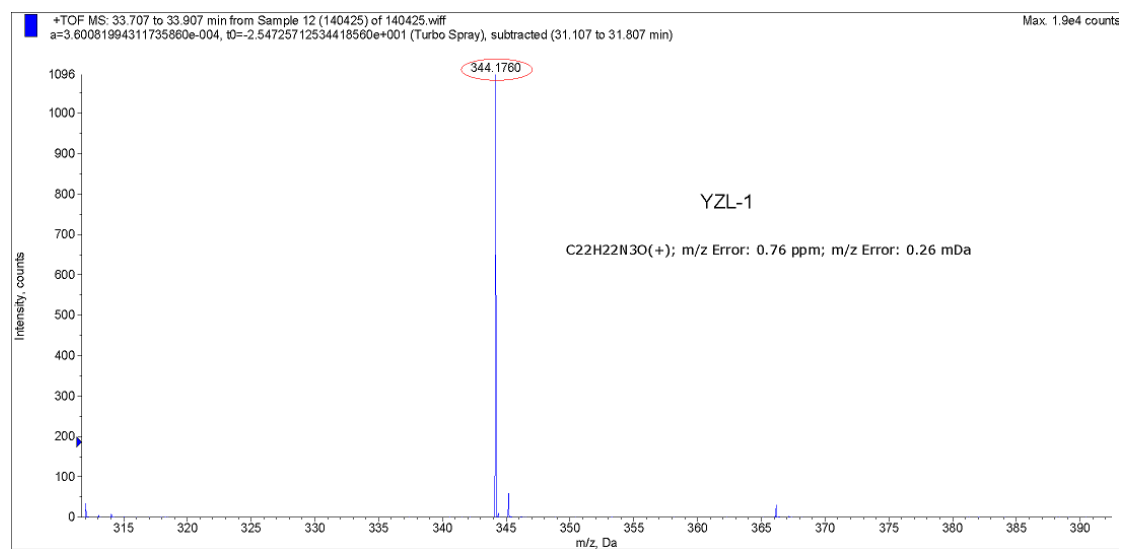

**Fig. S24** The HR-MS spectroscopy of **7**







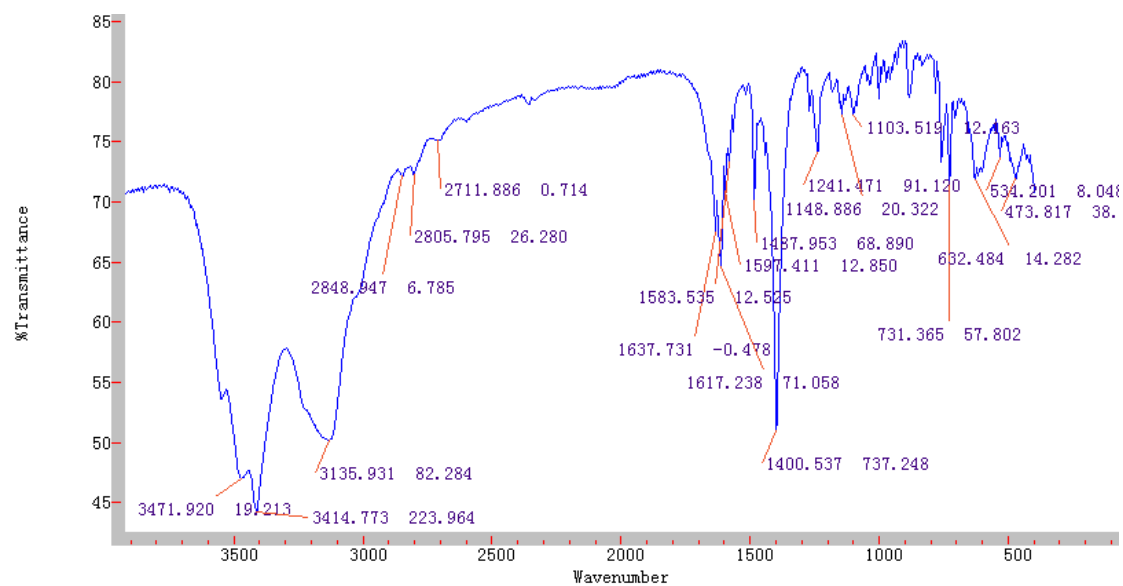

Fig. 29 The FT-IR spectroscopy of 5

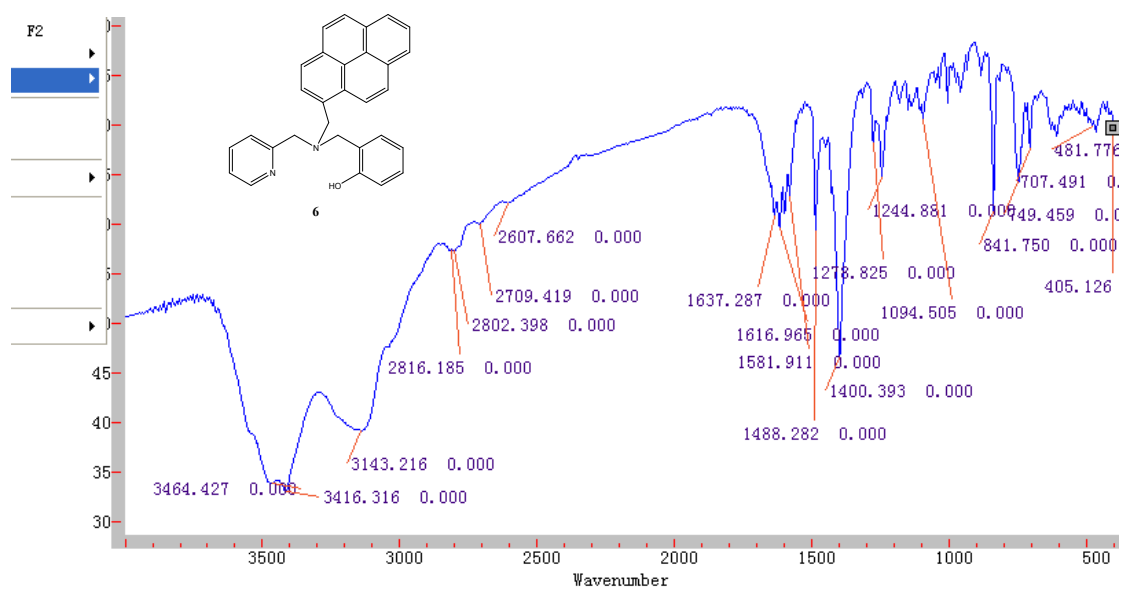

Fig. 30 The FT-IR spectroscopy of 6
