# Supplementary material for: Efficient synthesis of new asymmetric tripodal ligands using microwave irradiation, and their crystal structures
Source: Royal Society of Chemistry journal article supplement (doi:10.1039/c4ra07346k), 2014-01-01
Supplement: c4ra07346k2.pdf [file c4ra07346k2.pdf]

### **User Manual of Xianghu Microwave Instrument**

**Beijing Xianghu Science and Technology Development Co., Ltd.**

Tel: 8610- 84945003 Fax: 8610-64844291, Cell No.: 18601264622

Email: xianghu100@sina.com

### **Xianghu Microwave Instrument with Computer Controlled System for Synthesis and Solvent Extraction**

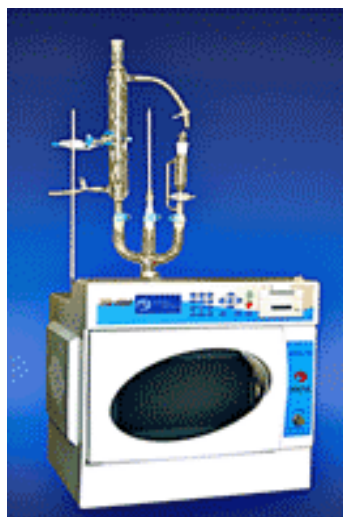

#### **Instruction:**

XH-100B microwave instrument was designed for catalyzing organic synthesis and solvent extraction. This instrument was equipped with the most advanced microwave technologies and computerized contact temperature sensor with precision at  $\pm 1^{\circ}\text{C}$ . The internal material employed has excellent high temperature and corrosion resistance. Most importantly, the whole system has been demonstrated microwave leak-free and meets state standard.

#### **Technical Parameters:**

1. Adjustable microwave power 100-850W
2. Reaction temperature range: 0-300°C
3. Store up to ten reaction conditions
4. LCD display
5. Record and print out all reaction conditions including temperature, reaction time, microwave power, temperature rate, etc.
6. Real reaction temperature monitoring with computerized contact temperature sensor with precision at 0.2°C

#### **Organic Reactions Catalyzed by Microwave**

This instrument has been widely used in a variety of organic reactions, such as addition, substitution, esterification, hydrolysis, polymerization, condensation, cyclization and oxidation, etc.

#### **Features of the Microwave Catalyzed Reaction**

1. Fast
2. High selectivity
3. High yield

4. Enhance the reactivity
5. Easy work up

*Address: No.12-01, Bld.D, fulin Rd.,*

*jinglongguojimingyuan, Chaoyang District, Beijing, P. R. China. Zip Code: 100107*

The main technical criteria of the product:

1. Power range:100-850w(divided 10 steps)
2. Temperature range:0-300°C
3. Precision of temperature measurement: $\leq\pm 0.2^{\circ}\text{C}$  Precision of controlled temperature: $\leq\pm 1^{\circ}\text{C}$
4. Reaction dimension:50-1000ml
5. Stainless steel cavity: anticorrosion and high temperature resistant
6. LCD screen displaying reaction condition and temperature curve
7. Storage of ten reaction conditions can be printed at anytime
8. Magnetic stirring with different velocity which make the reaction completeness and the temperature equalization
9. Friendly human-machine interface simple and convenient keyboard operation: according to the screen cue completing the operation process easily
10. Platinizing contacting temperature sensor: high precision and monitoring the temperature at anytime
11. Advanced computer self-learning technology: intelligently automatic controlling the heat preservation power
12. Open system: installing dropping funnel and condenser tube
13. Safety: microwave leak measure up nation standard

### **Configuration list**

| <b>Basic configuration</b>    |                 |                              |                 |
|-------------------------------|-----------------|------------------------------|-----------------|
| <b>Name</b>                   | <b>Quantity</b> | <b>Name</b>                  | <b>Quantity</b> |
| Host machine                  | 1               | Printer guides               | 2               |
| Sensor                        | 1               | Printer scroll               | 1               |
| Stainless steel vertical post | 1               | Polytetrafluoroethylene plug | 1               |
| Three-claw test clamp         | 1               | 250V/10A Fuse                | 2               |
| Cross clamp                   | 1               | Magneton                     | 1 pack          |

|                                |   |                        |   |
|--------------------------------|---|------------------------|---|
| Polytetrafluoroethylene gasket | 1 | Dustproof shield cover | 1 |
| T-piece glass pipes            | 2 | User's guide           | 1 |
| Plastic clamp                  | 3 |                        |   |
| Certificate                    | 1 |                        |   |
| <b>Optional configuration</b>  |   |                        |   |
| Printer                        |   |                        |   |
